# Supplementary material for: Designing Evolutionary-based Interception Strategies to Block the Transition from Precursor Phases to Multiple Myeloma
Source: Oxford University Press journal article supplement (doi:10.1158/1078-0432.ccr-20-1395), 2020-08-05
Supplement: 10780432ccr201395-sup-241248_2_supp_6431171_qdkdzh.docx [file 10780432ccr201395-sup-241248_2_supp_6431171_qdkdzh.docx]

**Supplementary Figure Legend**

**Supplementary Fig. 1.** Copy number changes associated with newly diagnosed multiple myelomas. A) Displayed by chromosome as gain in red and deletion in blue. B) Prevalence of specific translocations (green) and regions of copy number loss (red) and gain (blue) displayed as a bar graph. HRD = hyperdiploid.

**Supplementary Fig. 2.** Illustration of the evolutionary trajectories associated with multiple myeloma progression.
